# Supplementary material for: Dynamic Three-Dimensional Shoulder Kinematics In Patients With Massive Rotator Cuff Tears: A Comparison of Patients With And Without Subscapularis Tears
Source: Research Square preprint supplement (doi:10.21203/rs.3.rs-1014199/v1), 2021-11-02
Supplement: Supplementary file 1 [file bda16d65b0338775569643ec.xlsx]

## Sheet: Table 1
	Table 1. Demographic, radiographic and MRI data
		Intact SSC group	Torn SSC group	P value
	Demographic data
	No. of patients / shulders	5/5	10/10	ー
	Mean age, yr	78.4 ± 2.3	75.0 ± 7.4	0.61
	Male / Female	1/4	4/6	0.6
	Tear size of SSC
	Type I	ー	0
	Type II	ー	5
	Type III	ー	3
	Type IV	ー	2
	Fatty infiltration stage
	SSP	3.2 ± 0.8	3.6 ± 0.7	0.34
	ISP	2.6 ± 1.1	3.7 ± 0.5	0.1
	SSC	0.2 ± 0.4	2.7 ± 0.9	< 0.001
	Cuff tear arthropathy			0.29
	Grade 2	2	1
	Grade 3	2	4
	Grade 4A	1	1
	Grade 4B	0	4

## Sheet: Table 2
	Table2. Superior-inferior translation of the humeral head center between the Intact and Torn SSC group
		Intact SSC group			Torn SSC group		P value	95% CI
	Elevation angle, °	Mean	SD		Mean	SD		Lower	Upper
	Beginning	-1.1	1.6		1.8	3.4	0.04*	- 5.7	- 0.02
	20	-0.2	3		2.3	3.5	0.19	- 6.5	1.5
	30	0.1	3.1		2.2	3.8	0.29	- 6.2	2
	40	0.1	3.3		2.3	3.8	0.31	- 6.4	2.2
	50	0.1	2.6		2.3	3.9	0.21	- 5.9	1.5
	60	0.2	2.3		1.5	3.9	0.42	- 4.9	2.2
	70	-0.2	1.9		1.5	3.8	0.26	- 4.9	1.4
	80	0.01	2.2		1.3	3.5	0.38	- 4.6	1.9
	90	0.3	1.9		1.3	3.3	0.46	- 4.0	1.9
	100	0.4	1.6		1	3.2	0.63	- 3.4	2.1
	110	0.6	1.8		1	3.2	0.76	- 3.2	2.4
	120	0.5	2		0.8	3	0.79	- 3.2	2.5
	130	0.1	2.3		0.8	2.4	0.61	- 3.6	2.2
	140	0.01	3.1		0.2	2.2	0.89	- 4.0	3.6

## Sheet: Table 3
	Table3. Anterior-posterior translation of the humeral head center between the Intact and Torn SSC group
		Intact SSC group			Torn SSC group		P value	95% CI
	Elevation angle, °	Mean	SD		Mean	SD		Lower	Upper
	Beginning	1.4	3.9		1.8	2.2	0.8	- 3.6	2.8
	20	1.9	3.8		2.3	2.6	0.82	- 3.8	3.1
	30	2	3.4		2.7	2.2	0.61	- 3.8	2.3
	40	1.6	3.7		2.5	2	0.55	- 3.9	2.1
	50	2.2	4		1.9	1.8	0.83	- 2.7	3.3
	60	0.9	4.2		1.6	1.8	0.65	- 3.8	2.4
	70	0.5	4.4		1.3	2.1	0.64	- 4.2	2.7
	80	0.8	5.1		1.9	2.7	0.58	- 5.2	3
	90	0.5	4.8		1.7	2.7	0.52	- 5.2	2.7
	100	0.7	4.1		1.4	2.7	0.67	- 4.4	2.9
	110	0.1	4		1.4	2.9	0.49	- 5.1	2.5
	120	- 0.2	4.3		1	2.7	0.46	- 5.1	2.4
	130	- 0.5	4.3		0.8	2.8	0.44	- 5.2	2.4
	140	- 1.0	4		0.7	3.4	0.36	- 5.9	2.3

## Sheet: Table 4
	Table4. Lateral-medial translation of the humeral head center between the Intact and Torn SSC group
		Intact SSC group			Torn SSC group		P value	95% CI
	Elevation angle, °	Mean	SD		Mean	SD		Lower	Upper
	Beginning	24.9	3.2		26.4	2.5	0.32	- 4.8	1.6
	20	24	4.3		26.4	2	0.3	- 7.6	3
	30	23.9	4.1		26.4	1.9	0.26	- 7.5	2.5
	40	23.7	4		26.3	2.2	0.23	- 7.4	2.2
	50	23.5	3.7		26.5	2.3	0.15	- 7.5	1.4
	60	24.1	3.1		26.4	2.7	0.21	- 6.1	1.6
	70	23.7	3		26.3	2.7	0.16	- 6.3	1.2
	80	23.8	3		25.9	2.3	0.22	- 5.8	1.6
	90	24.1	3.7		26.1	2.5	0.33	- 6.4	2.5
	100	23.8	3.2		26.3	2.5	0.17	- 6.4	1.3
	110	23.9	2.5		26.3	2.5	0.12	- 5.5	0.7
	120	24.5	1.8		26.6	2.3	0.1	- 4.6	0.4
	130	24.3	1.4		26.5	2.6	0.11	- 4.9	0.5
	140	24.3	1.3		26.3	2.8	0.17	- 4.9	0.9

## Sheet: Table 5
	Table 5. Kinematic results
		Intact SSC group	Torn SSC group	P value
	Glenohumeral rotation, °
	Abduction
	Beginning	12.6 ± 9.5	10.8 ± 8.4	0.70
	End	97.1 ± 8.3	90.12 ± 9.42	0.17
	External rotation
	Beginning	42.3 ± 28.5	44.2 ± 28.3	0.9
	End	5.2 ± 12.5	9.4 ± 20.7	0.68
	Scapular rotation, °
	Upward rotation
	Beginning	13.8 ± 5.0	15.7 ± 9.3	0.66
	End	42.0 ± 5.5	52.1 ± 10.6	0.03*
	Posterior tilting
	Beginning	22.1 ± 5.0	25.6 ± 10.5	0.49
	End	- 13.7 ± 12.3	- 9.5 ± 11.8	0.52
	External rotation
	Beginning	43.9 ± 2.4	41.3 ± 9.2	0.54
	End	37.4 ± 7.3	28.5 ± 12.2	0.16
